# Supplementary material for: Epigenetic factor siRNA screen during primary KSHV infection identifies novel host restriction factors for the lytic cycle of KSHV
Source: PLoS Pathog. 2020 Jan 10;16(1):e1008268. doi: 10.1371/journal.ppat.1008268 (PMC6977772; doi:10.1371/journal.ppat.1008268)
Supplement: S4 Table — (XLSX) [file ppat.1008268.s012.xlsx]

## Sheet: sheet1
GENE ID	GI Number	Gene Accession	Gene Symbol	RTA replA	RTA replB	RTA average	LANA replA	LANA replB	LANA average
31	38679959	NM_198834	ACACA	1.08	1.18	1.13	0.6	0.58	0.59
326	4557292	NM_000658	AIRE	1.02	1.53	1.27	0.65	1.61	1.13
8165	109637793	NM_003488	AKAP1	0.97	0.57	0.77	1	0.67	0.84
5926	115334678	NM_023001	ARID4A	3.86	2.69	3.28	0.79	1.04	0.92
51742	118136293	NM_031371	ARID4B	ND	0.88	0.88	ND	1.2	1.2
55870	110349787	NM_018489	ASH1L	0.25	0.26	0.26	0.59	0.53	0.56
171023	91199555	NM_015338	ASXL1	0.58	0.27	0.43	0.59	0.38	0.49
29028	24497617	NM_014109	ATAD2	ND	ND	ND	ND	ND	ND
54454	153792535	NM_017552	ATAD2B	2.2	2.04	2.12	1.83	1.3	1.56
55729	38261961	NM_018179	ATF7IP	ND	2.07	2.07	ND	0.94	0.94
80063	38569429	NM_024997	ATF7IP2	0.98	1.48	1.23	1.23	1.47	1.35
472	73486662	NM_138292	ATM	ND	ND	ND	ND	ND	ND
545	157266316	NM_001184	ATR	1.22	1.28	1.25	0.4	0.55	0.47
546	130979649	NM_138270	ATRX	ND	0.55	0.55	ND	0.56	0.56
9212	83776599	NM_004217	AURKB	ND	ND	ND	ND	ND	ND
57597	145301616	NM_001080519	BAHCC1	2.3	1.67	1.98	1.31	1.06	1.18
22893	139394603	NM_014952	BAHD1	2.43	1.73	2.08	1.69	1.77	1.73
11177	32967602	NM_013448	BAZ1A	2.73	3.36	3.05	1.36	1.47	1.42
9031	115387100	NM_032408	BAZ1B	1.71	1.92	1.81	0.86	1.06	0.96
11176	91176324	NM_013449	BAZ2A	2.5	1.72	2.11	2.48	2.38	2.43
29994	94681062	NM_013450	BAZ2B	ND	ND	ND	ND	ND	ND
2186	119395732	NM_004459	BPTF	0.29	0.26	0.27	0.34	0.28	0.31
672	63252875	NM_007298	BRCA1	1.66	0.92	1.29	1.03	0.72	0.88
79184	64762482	NM_024332	BRCC3	ND	ND	ND	ND	ND	ND
23774	11321641	NM_014577	BRD1	1.4	1.27	1.34	1.12	1.21	1.17
6046	164419757	NM_001113182	BRD2	2	2.27	2.13	1.51	1.13	1.32
8019	12408642	NM_007371	BRD3	2.41	2.62	2.52	1.36	1.84	1.6
23476	112789560	NM_014299	BRD4	ND	2.16	2.16	ND	0.89	0.89
29117	41350211	NM_013263	BRD7	1.79	2.85	2.32	1.92	1.31	1.61
10902	34452704	NM_006696	BRD8	1.56	2.46	2.01	1.42	1.01	1.22
65980	57770649	NM_001009877	BRD9	ND	1.68	1.68	ND	2.16	2.16
676	46399197	NM_001726	BRDT	3.23	ND	3.23	1.39	ND	1.39
7862	51173721	NM_004634	BRPF1	0.94	1.92	1.43	0.84	0.99	0.91
27154	148727367	NM_015695	BRPF3	1.17	2.2	1.69	0.9	0.83	0.86
54014	55956929	NM_001007246	BRWD1	1.75	1.75	1.75	0.99	1.27	1.13
254065	153791629	NM_153252	BRWD3	1.46	1.14	1.3	1.36	1.07	1.21
699	56118215	NM_004336	BUB1	0.93	0.74	0.83	0.77	0.87	0.82
79697	106879205	NM_024644	C14orf169	ND	ND	ND	ND	ND	ND
10498	40288287	NM_199141	CARM1	0.69	0.59	0.64	0.47	0.47	0.47
10951	34147635	NM_006807	CBX1	0.95	1.66	1.3	0.45	0.63	0.54
84733	32306516	NM_032647	CBX2	ND	1.39	1.39	ND	1.54	1.54
11335	325197147	NM_016587	CBX3	0.49	0.5	0.5	1.12	1.14	1.13
8535	55770829	NM_003655	CBX4	3.34	ND	3.34	1.13	ND	1.13
23468	6912291	NM_012117	CBX5	ND	0.51	0.51	ND	1.58	1.58
23466	30348976	NM_014292	CBX6	ND	0.95	0.95	ND	0.49	0.49
23492	156071505	NM_175709	CBX7	ND	3.46	3.46	ND	2.53	2.53
57332	10190681	NM_020649	CBX8	ND	1.13	1.13	ND	0.66	0.66
5128	37595544	NM_002595	CDK17	ND	1.71	1.71	ND	0.92	0.92
1018	4557438	NM_001258	CDK3	0.61	0.77	0.69	0.78	0.9	0.84
1020	38454327	NM_004935	CDK5	1.17	0.86	1.02	0.66	0.53	0.59
9085	25453479	NM_004680	CDY1	0.69	0.99	0.84	0.6	0.81	0.71
9426	25453482	NM_004825	CDY2A	ND	0.51	0.51	ND	1.01	1.01
9425	25777616	NM_004824	CDYL	ND	0.59	0.59	ND	0.61	0.61
124359	116235486	NM_152342	CDYL2	0.93	1.15	1.04	1.09	0.78	0.94
27443	148612881	NM_031413	CECR2	ND	0.98	0.98	ND	1.17	1.17
10036	50513244	NM_005483	CHAF1A	ND	ND	ND	ND	ND	ND
1105	68299794	NM_001270	CHD1	ND	ND	ND	ND	ND	ND
1106	118421080	NM_001042572	CHD2	0.74	0.82	0.78	1.06	1.28	1.17
1107	158420732	NM_005852	CHD3	ND	ND	ND	ND	ND	ND
1108	51599155	NM_001273	CHD4	ND	1.89	1.89	ND	1.07	1.07
26038	24308088	NM_015557	CHD5	ND	ND	ND	ND	ND	ND
84181	29244923	NM_032221	CHD6	ND	1.97	1.97	ND	1.17	1.17
55636	54112402	NM_017780	CHD7	1.75	1.8	1.78	0.66	0.57	0.62
57680	114326454	NM_020920	CHD8	ND	0.8	0.8	ND	1	1
80205	95147341	NM_025134	CHD9	ND	ND	ND	ND	ND	ND
1147	62241000	NM_001278	CHUK	0.44	0.78	0.61	0.35	0.54	0.44
1387	119943101	NM_001079846	CREBBP	1.91	1.53	1.72	1.33	0.91	1.12
1460	26787971	NM_001320	CSNK2B	ND	ND	ND	ND	ND	ND
30827	156142179	NM_014593	CXXC1	0.09	0.18	0.13	0.23	0.31	0.27
1583	153218645	NM_000781	CYP11A1	1.04	0.64	0.84	1.14	0.97	1.06
1613	4557510	NM_001348	DAPK3	2.07	1.59	1.83	3.39	2.69	3.04
1660	100913205	NM_001357	DHX9	ND	2.66	2.66	ND	2.25	2.25
11083	71044475	NM_080796	DIDO1	0.63	0.61	0.62	1.14	0.96	1.05
1786	4503350	NM_001379	DNMT1	1.06	ND	1.06	0.5	ND	0.5
1788	28559066	NM_022552	DNMT3A	ND	ND	ND	ND	ND	ND
1789	28559059	NM_006892	DNMT3B	ND	0.88	0.88	ND	0.74	0.74
84444	163965372	NM_032482	DOT1L	1.42	1.3	1.36	1.66	1.35	1.5
8193	4758797	NM_004647	DPF1	0.26	0.26	0.26	0.48	0.48	0.48
5977	21536317	NM_006268	DPF2	0.48	0.54	0.51	0.68	0.72	0.7
8110	148762957	NM_012074	DPF3	ND	0.46	0.46	ND	0.64	0.64
151636	31377615	NM_138287	DTX3L	1.83	1.67	1.75	1.38	1.07	1.22
1843	259013538	NM_004417	DUSP1	1.23	1	1.12	1.14	0.81	0.98
79813	40217807	NM_024757	EHMT1	1.84	1.78	1.81	1.09	0.99	1.04
10919	156142198	NM_025256	EHMT2	0.51	0.93	0.72	0.6	1.13	0.87
55140	142349152	NM_018091	ELP3	0.8	1.33	1.06	0.92	0.76	0.84
2033	50345996	NM_001429	EP300	ND	2.22	2.22	ND	0.99	0.99
57634	56549695	NM_015409	EP400	0.77	0.52	0.65	0.95	0.95	0.95
54821	58331267	NM_017669	ERCC6L	1.13	0.9	1.01	0.73	0.88	0.8
2120	153267458	NM_001987	ETV6	3.29	4.14	3.72	1.25	1.72	1.48
2138	172072603	NM_172060	EYA1	0.8	0.88	0.84	0.97	0.64	0.8
2139	26667229	NM_172110	EYA2	ND	0.93	0.93	ND	0.86	0.86
2140	26667242	NM_001990	EYA3	0.79	ND	0.79	0.47	ND	0.47
2145	19923201	NM_001991	EZH1	0.39	0.32	0.35	0.98	0.82	0.9
2146	23510383	NM_152998	EZH2	0.91	1.05	0.98	0.51	0.49	0.5
54620	157168348	NM_001099784	FBXL19	0.33	0.57	0.45	0.53	1.1	0.82
55632	33620748	NM_017769	G2E3	0.75	0.46	0.61	0.64	0.63	0.63
54815	19923501	NM_017660	GATAD2A	1.61	0.94	1.28	2.2	1.52	1.86
57459	157674359	NM_020699	GATAD2B	4.47	4.03	4.25	0.51	0.72	0.62
84656	40556375	NM_032569	GLYR1	0.62	0.44	0.53	0.7	0.49	0.6
83903	56790918	NM_031965	GSG2	1.21	1.19	1.2	1.09	0.97	1.03
2932	21361339	NM_002093	GSK3B	0.57	0.93	0.75	0.52	0.44	0.48
9329	156119604	NM_012204	GTF3C4	ND	0.47	0.47	ND	0.91	0.91
8520	74319830	NM_001033085	HAT1	1.55	1.17	1.36	0.39	1.11	0.75
3065	13128859	NM_004964	HDAC1	ND	ND	ND	ND	ND	ND
83933	20070353	NM_032019	HDAC10	2.23	ND	2.23	1.35	ND	1.35
79885	13376227	NM_024827	HDAC11	ND	ND	ND	ND	ND	ND
3066	116284375	NM_001527	HDAC2	ND	ND	ND	ND	ND	ND
8841	157266338	NM_003883	HDAC3	ND	ND	ND	ND	ND	ND
9759	153085394	NM_006037	HDAC4	ND	ND	ND	ND	ND	ND
10014	62750346	NM_005474	HDAC5	ND	ND	ND	ND	ND	ND
10013	13128863	NM_006044	HDAC6	ND	ND	ND	ND	ND	ND
51564	148539869	NM_001098416	HDAC7	3.25	3.2	3.23	1.34	0.75	1.05
55869	8923768	NM_018486	HDAC8	ND	1.74	1.74	ND	0.97	0.97
9734	116284379	NM_058177	HDAC9	5.39	ND	5.39	1.35	ND	1.35
3068	4758515	NM_004494	HDGF	0.43	1.1	0.77	0.74	1	0.87
154150	110681711	NM_138574	HDGFL1	0.44	0.88	0.66	0.69	1.04	0.86
84717	38146102	NM_032631	HDGFRP2	1.57	2.2	1.89	0.61	0.7	0.66
50810	21359902	NM_016073	HDGFRP3	3.07	1.35	2.21	0.78	1.03	0.91
55662	148596935	NM_017902	HIF1AN	ND	1.56	1.56	ND	1.12	1.12
25988	39725947	NM_015517	HINFP	2.53	1.29	1.91	1.34	0.97	1.16
3141	19923101	NM_000411	HLCS	0.98	1.37	1.17	1.82	2.22	2.02
6596	117968479	NM_139048	HLTF	0.9	0.52	0.71	1.08	0.81	0.95
55806	70906481	NM_018411	HR	ND	ND	ND	ND	ND	ND
79663	142383186	NM_024610	HSPBAP1	3.14	1.64	2.39	0.68	0.26	0.47
10075	61676187	NM_031407	HUWE1	1.48	0.91	1.2	0.94	0.68	0.81
3621	38201662	NM_198217	ING1	0.27	0.24	0.25	0.56	0.62	0.59
3622	59814661	NM_001564	ING2	0.12	0.1	0.11	0.58	0.68	0.63
54556	38201658	NM_198267	ING3	0.54	0.77	0.65	0.51	0.44	0.48
51147	38201669	NM_016162	ING4	0.15	0.29	0.22	0.26	0.5	0.38
84289	38201673	NM_032329	ING5	0.3	0.48	0.39	0.22	0.28	0.25
54617	38708320	NM_017553	INO80	0.61	0.66	0.63	0.53	0.66	0.6
57117	21361850	NM_020395	INTS12	0.21	0.31	0.26	0.51	0.65	0.58
79960	111154093	NM_024900	JADE1	0.57	1.44	1.01	0.54	1.27	0.91
23338	40556369	NM_015288	JADE2	0.05	0.14	0.09	0.13	0.31	0.22
9767	117190333	NM_001077445	JADE3	0.59	0.44	0.52	0.34	0.24	0.29
3717	13325062	NM_004972	JAK2	ND	ND	ND	ND	ND	ND
3720	11863151	NM_004973	JARID2	2.16	1.59	1.87	1.33	1.36	1.34
221037	68342035	NM_004241	JMJD1C	1.42	ND	1.42	0.68	ND	0.68
65094	12711669	NM_023007	JMJD4	ND	ND	ND	ND	ND	ND
23210	125988388	NM_015167	JMJD6	2.45	ND	2.45	1.84	ND	1.84
339123	56090145	NM_001005920	JMJD8	1.68	ND	1.68	1.2	ND	1.2
2648	153791534	NM_021078	KAT2A	2.39	2.35	2.37	1.51	1.39	1.45
8850	6382075	NM_003884	KAT2B	1	ND	1	0.87	ND	0.87
10524	36287068	NM_182710	KAT5	4.2	ND	4.2	1.26	ND	1.26
7994	150378492	NM_006766	KAT6A	ND	ND	ND	ND	ND	ND
23522	100816396	NM_012330	KAT6B	ND	1.16	1.16	ND	0.63	0.63
11143	34222309	NM_007067	KAT7	ND	ND	ND	ND	ND	ND
84148	14149874	NM_032188	KAT8	ND	ND	ND	ND	ND	ND
23028	58761545	NM_015013	KDM1A	0.85	0.78	0.81	1.19	1.46	1.33
221656	116256450	NM_153042	KDM1B	ND	0.91	0.91	ND	0.71	0.71
22992	16306579	NM_012308	KDM2A	2.48	2.04	2.26	0.72	0.79	0.76
84678	54112379	NM_001005366	KDM2B	2.79	4.69	3.74	0.82	1.35	1.08
55818	156602657	NM_018433	KDM3A	0.85	0.53	0.69	0.71	0.46	0.58
51780	54873608	NM_016604	KDM3B	1.28	ND	1.28	0.74	ND	0.74
9682	98986458	NM_014663	KDM4A	1.28	1.52	1.4	0.88	0.77	0.82
23030	45504379	NM_015015	KDM4B	0.5	0.48	0.49	0.78	0.92	0.85
23081	226442896	NM_001146696	KDM4C	1.75	2.93	2.34	0.97	1.72	1.34
55693	39653316	NM_018039	KDM4D	1.34	1.52	1.43	0.54	0.87	0.71
5927	110618243	NM_001042603	KDM5A	1.14	ND	1.14	1.16	ND	1.16
10765	57242795	NM_006618	KDM5B	ND	0.71	0.71	ND	1.35	1.35
8242	109255242	NM_004187	KDM5C	1.91	0.95	1.43	2.14	1.84	1.99
8284	56243542	NM_004653	KDM5D	0.6	1.04	0.82	1.89	2.91	2.4
7403	10863942	NM_021140	KDM6A	3.51	3.94	3.73	2.01	1.53	1.77
23135	122937250	NM_001080424	KDM6B	ND	ND	ND	ND	ND	ND
80853	90093354	NM_030647	KDM7A	0.62	0.95	0.78	0.67	1.56	1.12
79831	13376122	NM_024773	KDM8	ND	ND	ND	ND	ND	ND
23349	149944592	NM_015297	KIAA1045	0.22	0.35	0.29	0.37	0.66	0.52
4297	56550038	NM_005933	KMT2A	0.39	0.36	0.37	0.57	0.62	0.59
9757	7662045	NM_014727	KMT2B	0.71	1.08	0.89	0.5	1.09	0.8
58508	91718901	NM_170606	KMT2C	1.21	1.27	1.24	0.53	0.59	0.56
8085	148762968	NM_003482	KMT2D	1.62	2.97	2.3	0.47	0.96	0.71
55904	91199542	NM_018682	KMT2E	0.84	0.84	0.84	0.69	0.91	0.8
26013	117938327	NM_015478	L3MBTL1	0.21	0.34	0.28	0.19	0.47	0.33
83746	51173749	NM_031488	L3MBTL2	0.33	ND	0.33	0.54	ND	0.54
84456	55770871	NM_001007102	L3MBTL3	ND	0.59	0.59	ND	0.54	0.54
91133	158138527	NM_173464	L3MBTL4	ND	0.76	0.76	ND	0.77	0.77
3930	37595749	NM_002296	LBR	3.25	1.69	2.47	1.16	0.66	0.91
3985	73390139	NM_001031801	LIMK2	1.77	2.17	1.97	0.43	0.59	0.51
286826	32996736	NM_173083	LIN9	ND	1.43	1.43	ND	1.61	1.61
1326	22035597	NM_005204	MAP3K8	0.94	1.91	1.42	0.43	0.77	0.6
84930	14249561	NM_032844	MASTL	0.76	0.59	0.68	0.48	0.52	0.5
4152	156105676	NM_002384	MBD1	1.36	1.8	1.58	1.19	0.8	0.99
8932	48255922	NM_015832	MBD2	1.24	0.94	1.09	0.98	1.31	1.14
53615	21464122	NM_003926	MBD3	2.31	2.07	2.19	1.34	0.98	1.16
85509	21624655	NM_145208	MBD3L1	1.01	1.64	1.32	0.7	1.56	1.13
125997	157389002	NM_144614	MBD3L2	0.46	0.41	0.43	1.08	0.73	0.91
8930	4505120	NM_003925	MBD4	1.23	1.75	1.49	0.98	0.85	0.92
55777	38202208	NM_018328	MBD5	3.41	2.31	2.86	1.24	1.13	1.18
114785	24308373	NM_052897	MBD6	1.49	1.56	1.53	1.47	0.89	1.18
54799	158508475	NM_017643	MBTD1	0.88	1.15	1.01	1.11	1.07	1.09
9656	132626687	NM_014641	MDC1	1.72	1.71	1.71	1	0.74	0.87
4204	160707949	NM_001110792	MECP2	0.69	0.97	0.83	0.68	0.56	0.62
10724	142344050	NM_012215	MGEA5	ND	ND	ND	ND	ND	ND
84864	110227620	NM_153182	MINA	ND	1.66	1.66	ND	1.02	1.02
4292	28559089	NM_000249	MLH1	0.61	0.67	0.64	0.42	0.76	0.59
8028	57546898	NM_001009569	MLLT10	0.35	0.33	0.34	0.42	0.63	0.52
4302	133908639	NM_005937	MLLT6	ND	ND	ND	ND	ND	ND
10933	5803101	NM_006791	MORF4L1	ND	0.59	0.59	ND	0.66	0.66
54737	41055988	NM_017520	MPHOSPH8	1.09	1.48	1.29	1.26	1.79	1.52
2956	157426894	NM_000179	MSH6	0.33	0.82	0.58	0.43	0.69	0.56
10943	17975758	NM_078630	MSL3	ND	ND	ND	ND	ND	ND
9112	115527079	NM_004689	MTA1	1.87	1.57	1.72	0.91	1.18	1.04
9219	14141169	NM_004739	MTA2	0.3	0.82	0.56	0.5	0.64	0.57
57504	50878291	NM_020744	MTA3	1.38	0.99	1.18	0.9	1.28	1.09
22823	141802285	NM_007358	MTF2	0.75	0.47	0.61	2.03	1.68	1.85
114803	148227841	NM_001085487	MYSM1	ND	ND	ND	ND	ND	ND
55226	13399321	NM_024662	NAT10	2.23	ND	2.23	0.61	ND	0.61
8648	59938782	NM_147233	NCOA1	ND	1.01	1.01	ND	0.73	0.73
8202	32307123	NM_006534	NCOA3	1.02	1.49	1.26	0.71	1.19	0.95
10783	34147501	NM_014397	NEK6	1.82	ND	1.82	0.73	ND	0.73
91754	31543285	NM_033116	NEK9	ND	ND	ND	ND	ND	ND
4799	22212923	NM_002504	NFX1	0.45	0.63	0.54	0.51	0.52	0.52
23467	17402887	NM_014293	NPTXR	3.63	ND	3.63	0.63	ND	0.63
64324	27477093	NM_022455	NSD1	0.43	0.63	0.53	0.7	0.96	0.83
8473	32307147	NM_181672	OGT	ND	ND	ND	ND	ND	ND
4998	31795543	NM_004153	ORC1	1.8	2.51	2.16	1.3	1.06	1.18
23569	6912575	NM_012387	PADI4	0.63	0.97	0.8	0.61	0.97	0.79
5062	45827795	NM_002577	PAK2	1.19	ND	1.19	1.04	ND	1.04
8505	70610135	NM_003631	PARG	ND	ND	ND	ND	ND	ND
142	156523967	NM_001618	PARP1	0.98	0.91	0.94	1.09	0.99	1.04
55193	93102368	NM_181042	PBRM1	1.99	2.38	2.18	0.93	1.18	1.05
5252	21536450	NM_002636	PHF1	0.29	0.27	0.28	0.64	0.99	0.81
55274	19747274	NM_018288	PHF10	0.13	ND	0.13	0.35	ND	0.35
51131	94681068	NM_001040444	PHF11	0.21	0.26	0.24	0.36	0.44	0.4
57649	75677337	NM_020889	PHF12	0.51	0.4	0.45	0.47	0.57	0.52
148479	24432092	NM_153812	PHF13	0.25	0.12	0.18	0.45	0.24	0.35
9678	55769549	NM_001007157	PHF14	ND	ND	ND	ND	ND	ND
26147	58331162	NM_001009936	PHF19	0.38	0.46	0.42	0.51	0.54	0.53
5253	117190341	NM_005392	PHF2	0.13	0.33	0.23	0.31	0.74	0.52
51230	110735447	NM_016436	PHF20	0.41	0.54	0.48	1	1.09	1.04
51317	156546909	NM_016621	PHF21A	0.9	0.5	0.7	0.78	0.62	0.7
112885	142373250	NM_138415	PHF21B	0.27	0.27	0.27	0.87	1.05	0.96
79142	116268090	NM_024297	PHF23	0.46	0.37	0.42	0.39	0.33	0.36
23469	141801721	NM_015153	PHF3	0.35	0.26	0.3	1.44	1.56	1.5
84295	63478059	NM_032335	PHF6	0.23	0.41	0.32	0.39	0.64	0.52
51533	27894288	NM_016483	PHF7	0.21	0.07	0.14	0.46	0.13	0.29
23133	32698699	NM_015107	PHF8	0.51	0.23	0.37	0.36	0.28	0.32
55023	38679895	NM_017934	PHIP	1.75	1.75	1.75	0.83	0.6	0.72
57661	221139763	NM_020901	PHRF1	1.07	0.98	1.03	0.9	1.08	0.99
5585	4506072	NM_002741	PKN1	1.16	ND	1.16	0.45	ND	0.45
100137049	167860119	NM_001114633	PLA2G4B	ND	1.28	1.28	ND	2.17	2.17
8493	29558519	NM_003620	PPM1D	1.87	1.18	1.52	0.6	0.48	0.54
5501	4506006	NM_002710	PPP1CC	ND	ND	ND	ND	ND	ND
5515	57222566	NM_002715	PPP2CA	ND	ND	ND	ND	ND	ND
5516	57634540	NM_004156	PPP2CB	ND	ND	ND	ND	ND	ND
5531	4506026	NM_002720	PPP4C	1.01	0.97	0.99	0.59	0.5	0.55
5536	20127496	NM_006247	PPP5C	1.24	1.2	1.22	0.73	0.99	0.86
639	33946273	NM_182907	PRDM1	0.65	0.87	0.76	0.2	0.31	0.25
56981	41349465	NM_020229	PRDM11	1.45	1.08	1.27	0.94	0.87	0.91
59335	15042948	NM_021619	PRDM12	0.69	1.06	0.88	1.85	2.19	2.02
59336	11055981	NM_021620	PRDM13	1.48	1.62	1.55	0.64	0.59	0.62
63978	41349468	NM_024504	PRDM14	0.68	0.78	0.73	0.91	0.73	0.82
63977	93204878	NM_022115	PRDM15	0.89	1.09	0.99	0.6	0.47	0.54
63976	289547570	NM_199454	PRDM16	0.72	0.99	0.85	1.16	1.66	1.41
7799	55953109	NM_001007257	PRDM2	1.09	1.79	1.44	0.47	0.71	0.59
11108	41349473	NM_012406	PRDM4	1.35	1.29	1.32	1.19	1.16	1.18
11107	41349475	NM_018699	PRDM5	1.17	0.91	1.04	1.33	1.56	1.44
11105	41349477	NM_052996	PRDM7	0.9	0.87	0.89	0.74	0.72	0.73
56978	150378477	NM_001099403	PRDM8	1.33	1.64	1.48	0.59	0.55	0.57
56979	147905619	NM_020227	PRDM9	1.49	1.48	1.49	0.83	1.16	1
10216	67190162	NM_005807	PRG4	1.07	1.03	1.05	0.96	0.97	0.96
5579	40255270	NM_002738	PRKCB	1.12	1.55	1.33	0.36	0.56	0.46
5580	31377781	NM_006254	PRKCD	ND	ND	ND	ND	ND	ND
5591	31340617	NM_006904	PRKDC	1.97	2.08	2.03	0.55	0.4	0.47
3276	151301218	NM_198318	PRMT1	0.39	0.42	0.4	0.56	0.53	0.55
3275	4504494	NM_001535	PRMT2	0.33	0.29	0.31	3.2	2.83	3.02
10196	142368309	NM_005788	PRMT3	0.7	0.59	0.65	0.69	0.78	0.74
10419	88900510	NM_006109	PRMT5	0.24	0.22	0.23	0.49	0.45	0.47
55170	8922514	NM_018137	PRMT6	0.47	0.43	0.45	0.61	0.33	0.47
54496	9506614	NM_019023	PRMT7	0.14	0.52	0.33	0.54	1.01	0.77
56341	74099698	NM_019854	PRMT8	0.67	1.3	0.99	0.42	0.71	0.57
11168	16945969	NM_021144	PSIP1	0.57	0.76	0.66	0.48	0.6	0.54
114825	153791981	NM_052927	PWWP2A	1.52	1.06	1.29	1.02	0.85	0.94
170394	148839310	NM_001098637	PWWP2B	0.82	0.63	0.73	1.29	0.99	1.14
26108	30911102	NM_015617	PYGO1	0.41	ND	0.41	0.41	ND	0.41
90780	56676333	NM_138300	PYGO2	0.38	0.79	0.59	0.21	0.33	0.27
25788	20143928	NM_012415	RAD54B	1.53	1.16	1.34	1.09	1.18	1.13
8438	19924136	NM_003579	RAD54L	1.13	0.73	0.93	1.23	0.86	1.05
5896	4557840	NM_000448	RAG1	1.39	1.77	1.58	2.5	2.43	2.46
10743	40807476	NM_030665	RAI1	0.19	0.4	0.3	0.2	0.47	0.33
5914	75812906	NM_000964	RARA	ND	2.48	2.48	ND	1	1
5928	5032026	NM_005610	RBBP4	ND	0.81	0.81	ND	0.78	0.78
5931	13259504	NM_002893	RBBP7	1.52	1.75	1.63	0.84	1.59	1.21
9978	22091459	NM_014248	RBX1	0.68	0.71	0.69	1.1	0.84	0.97
473	112382225	NM_001042682	RERE	1.78	1.19	1.48	1.42	1.73	1.58
6015	51479191	NM_002931	RING1	1.36	1.1	1.23	0.7	0.96	0.83
165918	31377565	NM_152617	RNF168	1.08	0.81	0.94	1.19	0.78	0.98
56163	94421470	NM_031277	RNF17	1.27	0.77	1.02	1.01	0.87	0.94
6045	54792140	NM_007212	RNF2	1.32	0.68	1	1.57	0.88	1.22
56254	34878776	NM_019592	RNF20	1.39	1.27	1.33	0.9	0.66	0.78
9810	37588854	NM_014771	RNF40	2.19	1.12	1.65	0.52	0.5	0.51
9025	157419146	NM_183078	RNF8	0.69	0.83	0.76	0.66	0.67	0.66
8731	4506566	NM_003799	RNMT	ND	0.89	0.89	ND	1.44	1.44
55178	21359921	NM_018146	RNMTL1	1.68	2.19	1.94	0.59	1.39	0.99
8986	55743137	NM_001006944	RPS6KA4	1.67	1.07	1.37	1.24	1.56	1.4
9252	32528296	NM_182398	RPS6KA5	0.96	ND	0.96	0.26	ND	0.26
51773	38788332	NM_016578	RSF1	0.6	0.71	0.66	0.66	0.56	0.61
22955	142383813	NM_012236	SCMH1	0.6	0.5	0.55	0.51	0.86	0.68
10389	5174668	NM_006089	SCML2	0.47	0.59	0.53	0.4	0.4	0.4
9739	55741676	NM_014712	SETD1A	1.65	1.68	1.66	1.06	1.44	1.25
23067	113423508	XM_037523	SETD1B	0.41	0.48	0.44	0.47	0.74	0.6
29072	89111137	NM_014159	SETD2	2.06	2	2.03	0.62	0.62	0.62
84193	40068480	NM_032233	SETD3	0.98	0.96	0.97	0.67	0.68	0.68
54093	55953062	NM_001007259	SETD4	1.97	1.16	1.57	0.81	0.74	0.77
55209	122937491	NM_001080517	SETD5	0.91	0.79	0.85	1.26	0.85	1.05
79918	13376287	NM_024860	SETD6	0.23	0.17	0.2	0.5	0.57	0.53
80854	83035135	NM_030648	SETD7	0.66	0.64	0.65	0.51	0.62	0.56
387893	45356742	NM_020382	SETD8	0.75	0.49	0.62	1.04	1.05	1.04
9869	6912651	NM_012432	SETDB1	0.81	1.25	1.03	0.57	0.89	0.73
83852	13994281	NM_031915	SETDB2	0.22	0.21	0.21	0.8	1.04	0.92
6419	156627566	NM_006515	SETMAR	0.39	0.64	0.51	0.47	0.81	0.64
51460	53692192	NM_016329	SFMBT1	0.49	ND	0.49	0.95	ND	0.95
57713	71274153	NM_001029880	SFMBT2	1.62	1.35	1.49	0.57	1.34	0.96
6472	52851445	NM_005412	SHMT2	ND	1.01	1.01	ND	1.21	1.21
257218	111548663	NM_173082	SHPRH	0.45	0.37	0.41	0.53	0.49	0.51
25942	23397665	NM_015477	SIN3A	0.33	0.65	0.49	0.61	0.7	0.65
23411	13775598	NM_012238	SIRT1	1.91	1.32	1.61	1.27	1.19	1.23
22933	13775601	NM_030593	SIRT2	1.73	1.34	1.53	0.95	0.82	0.89
23410	157671925	NM_001017524	SIRT3	0.87	0.72	0.8	1.84	1.51	1.67
23409	6912661	NM_012240	SIRT4	1.12	1.19	1.15	1.06	0.98	1.02
23408	13787213	NM_012241	SIRT5	0.62	0.62	0.62	0.74	0.66	0.7
51548	7706709	NM_016539	SIRT6	2.01	1.58	1.8	0.89	1.02	0.95
51547	7706711	NM_016538	SIRT7	0.72	0.7	0.71	1.36	1.73	1.54
6594	164419748	NM_139035	SMARCA1	0.45	0.49	0.47	0.72	0.58	0.65
6595	48255899	NM_003070	SMARCA2	2.27	1.16	1.71	1.13	1.67	1.4
6597	21071055	NM_003072	SMARCA4	1.51	1.33	1.42	1.21	1.27	1.24
8467	21071057	NM_003601	SMARCA5	0.81	0.81	0.81	0.39	0.57	0.48
50485	21071059	NM_014140	SMARCAL1	1.13	0.89	1.01	0.75	0.42	0.59
6599	21237801	NM_003074	SMARCC1	1.58	2.06	1.82	0.79	1.04	0.91
6601	21237804	NM_003075	SMARCC2	0.62	0.92	0.77	0.38	1.16	0.77
10285	21361283	NM_005871	SMNDC1	2.89	1.99	2.44	0.8	0.71	0.75
150572	58037544	NM_198274	SMYD1	1.66	1.87	1.76	0.82	0.77	0.8
56950	9910273	NM_020197	SMYD2	0.74	0.66	0.7	1.47	1.3	1.39
64754	12232400	NM_022743	SMYD3	1.79	1.65	1.72	1.28	1.57	1.43
114826	156616307	NM_052928	SMYD4	0.83	0.57	0.7	0.61	0.32	0.46
10322	154689857	NM_006062	SMYD5	1.35	0.94	1.14	1.16	0.75	0.95
27044	77404396	NM_014390	SND1	1.07	0.76	0.92	1.44	1.23	1.34
6672	122939209	NM_003113	SP100	1.66	1.83	1.74	0.82	0.91	0.87
3431	17986251	NM_004510	SP110	0.05	0.09	0.07	0.56	0.65	0.61
11262	52487276	NM_001005176	SP140	0.27	0.3	0.29	0.17	0.27	0.22
23013	14790189	NM_015001	SPEN	2.17	2.07	2.12	0.91	1.01	0.96
6793	5174700	NM_005990	STK10	ND	0.82	0.82	ND	0.54	0.54
56164	14602442	NM_031414	STK31	0.54	0.73	0.63	0.66	0.49	0.57
6789	38327560	NM_006282	STK4	1.08	1.27	1.18	0.43	0.6	0.51
9913	7662291	NM_014860	SUPT7L	2.19	2.13	2.16	0.99	0.93	0.96
6839	112382253	NM_003173	SUV39H1	0.37	0.46	0.41	0.95	1.67	1.31
79723	34147611	NM_024670	SUV39H2	1.83	0.58	1.21	1.43	0.57	1
51111	50659083	NM_016028	SUV420H1	0.85	0.74	0.8	0.63	0.57	0.6
84787	192447420	NM_032701	SUV420H2	0.62	1	0.81	0.47	0.59	0.53
6872	20357584	NM_004606	TAF1	ND	1.14	1.14	ND	0.69	0.69
138474	142375765	NM_153809	TAF1L	0.65	0.7	0.67	1.08	0.94	1.01
83860	157909851	NM_031923	TAF3	0.17	0.21	0.19	0.32	0.46	0.39
6894	110825987	NM_005646	TARBP1	ND	ND	ND	ND	ND	ND
6941	117414151	NM_001077511	TCF19	0.38	0.39	0.38	0.44	0.4	0.42
6942	31652241	NM_181492	TCF20	0.43	0.58	0.51	0.57	0.59	0.58
56165	38505160	NM_198795	TDRD1	1.03	2.36	1.7	0.97	0.73	0.85
126668	148613863	NM_182499	TDRD10	ND	1.21	1.21	ND	1.09	1.09
91646	161016764	NM_001110822	TDRD12	2.79	2.51	2.65	0.86	0.93	0.9
81550	13540575	NM_030794	TDRD3	0.59	0.81	0.7	0.77	1.13	0.95
163589	40255177	NM_173533	TDRD5	2.83	2.53	2.68	0.75	1.16	0.96
221400	58197557	NM_001010870	TDRD6	1.57	0.97	1.27	0.42	0.43	0.42
23424	112293286	NM_014290	TDRD7	ND	1.92	1.92	ND	1.04	1.04
122402	42734387	NM_153046	TDRD9	0.96	1.18	1.07	0.79	1.21	1
11022	145312255	NM_006862	TDRKH	2.2	1.39	1.8	1.17	1.46	1.32
54386	52627148	NM_018975	TERF2IP	0.7	1.61	1.16	0.44	0.84	0.64
80745	142367052	NM_025264	THUMPD2	1.29	1.77	1.53	0.97	0.9	0.94
9874	33636697	NM_012290	TLK1	ND	ND	ND	ND	ND	ND
84629	122937429	NM_001080495	TNRC18	2.6	2.01	2.31	1.22	2.07	1.65
7158	5032188	NM_005657	TP53BP1	0.75	0.74	0.74	1.29	1.04	1.16
1787	109637750	NM_176081	TRDMT1	2.14	2.17	2.16	0.68	1.26	0.97
8805	47419908	NM_003852	TRIM24	0.09	0.25	0.17	0.59	0.9	0.74
10155	14971416	NM_005762	TRIM28	0.6	0.56	0.58	0.47	0.58	0.53
51592	74027250	NM_033020	TRIM33	0.09	0.22	0.15	0.22	0.44	0.33
4591	52487175	NM_001005207	TRIM37	1.69	1.18	1.44	1.11	0.45	0.78
9866	209977096	NM_014818	TRIM66	0.35	0.2	0.28	0.32	0.37	0.35
60487	94420682	NM_001031712	TRMT11	ND	1.09	1.09	ND	2.83	2.83
8458	40807470	NM_003594	TTF2	0.44	0.33	0.38	0.51	0.45	0.48
129450	89242133	NM_001039693	TYW5	ND	ND	ND	ND	ND	ND
23304	27597060	NM_015255	UBR2	2.25	1.39	1.82	1.43	1.87	1.65
29128	115430234	NM_001048201	UHRF1	2.35	2.33	2.34	0.59	0.75	0.67
115426	23312363	NM_152896	UHRF2	0.48	0.45	0.47	0.68	0.66	0.67
10600	50312663	NM_001001992	USP16	ND	ND	ND	ND	ND	ND
23326	150010638	NM_015276	USP22	ND	ND	ND	ND	ND	ND
9960	55770885	NM_006537	USP3	ND	ND	ND	ND	ND	ND
7404	33188430	NM_007125	UTY	0.96	ND	0.96	0.52	ND	0.52
7468	6594682	NM_007331	WHSC1	1.13	1.87	1.5	0.67	1.15	0.91
54904	13699812	NM_017778	WHSC1L1	1.27	0.75	1.01	1.67	1.27	1.47
7515	5454171	NM_006297	XRCC1	1.41	1.09	1.25	1.72	1.45	1.59
55063	94721343	NM_017984	ZCWPW1	1.6	1.06	1.33	0.94	0.7	0.82
152098	94536775	NM_001040432	ZCWPW2	1.67	1.57	1.62	0.54	0.75	0.65
10771	5729745	NM_006624	ZMYND11	0.84	0.54	0.69	0.82	1	0.91
23613	34335265	NM_012408	ZMYND8	0.55	0.73	0.64	0.41	0.41	0.41
